# Supplementary material for: Preparation of thermoresponsive hydrogels via polymerizable deep eutectic monomer solvents
Source: Royal Society of Chemistry journal article supplement (doi:10.1039/d0py01159b), 2020-11-24
Supplement: d0py01159b1.pdf [file d0py01159b1.pdf]

**Electronic Supplementary Information (ESI) for  
Preparation of Thermoresponsive Hydrogels via  
Polymerizable Deep Eutectic Monomer Solvents**

Yeasmin Nahar, James Horne, Vinh Truong, Alex C. Bissember and Stuart C.  
Thickett\*

**Table S1.** Elemental Analysis Results of Deep Eutectic Monomer Solvents

| <b>Sample</b>                       | <b>C %</b> | <b>H %</b> | <b>N %</b> | <b>C/N ratio</b> |
|-------------------------------------|------------|------------|------------|------------------|
| NIPAM:ChCl<br>(initial ratio 3:1)   | 61.52      | 10.32      | 12.18      | 5.05             |
| <i>Predicted values:</i>            |            |            |            |                  |
| NIPAM:ChCl 3:1                      | 57.65      | 9.88       | 11.69      | 5.03             |
| NIPAM:ChCl 10.5:1                   | 61.54      | 9.77       | 12.14      | 5.07             |
|                                     |            |            |            |                  |
| NIPAM:AcChCl<br>(initial ratio 3:1) | 58.84      | 9.68       | 11.15      | 5.27             |
| <i>Predicted values:</i>            |            |            |            |                  |
| NIPAM:AcChCl 3:1                    | 57.64      | 9.41       | 10.76      | 5.35             |
| NIPAM:AcChCl 4:1                    | 58.72      | 9.47       | 11.04      | 5.31             |

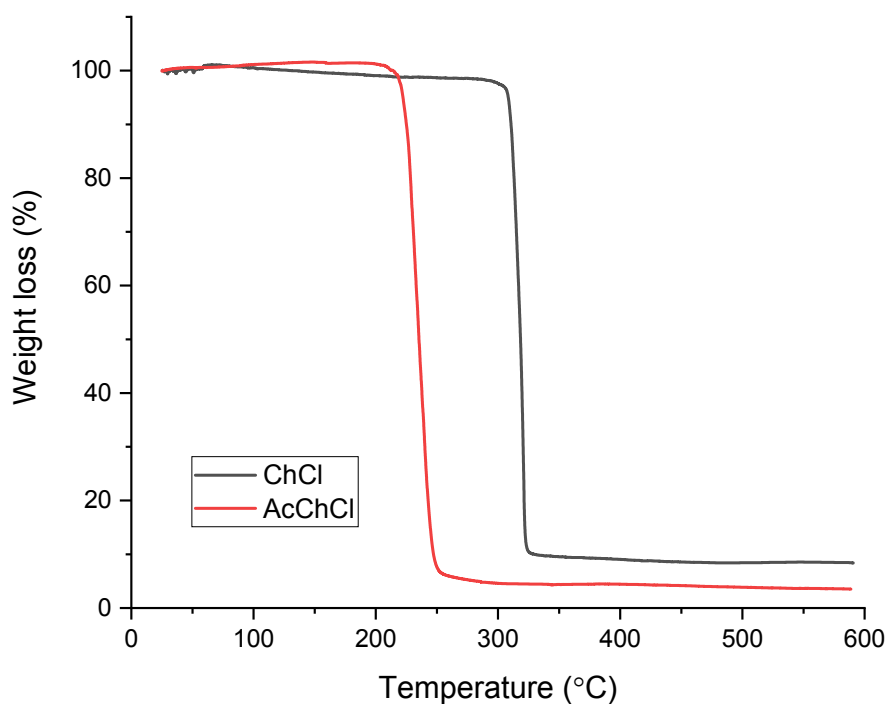

**Figure S1.** Thermogravimetric analysis (TGA) of choline chloride and acetylcholine chloride.

**Table S2.** Onset Temperature and Weight Loss Data from TGA Analysis.

| Sample                    | $T_{\text{onset}}$ (°C) | Total Weight loss (%) |
|---------------------------|-------------------------|-----------------------|
| NIPAM                     | 160                     | 98.55                 |
| ChCl                      | 307                     | 89.93                 |
| NIPAM-ChCl 3:1 eutectic   | 236                     | 93.91                 |
| AcChCl                    | 222                     | 96.06                 |
| NIPAM-AcChCl 3:1 eutectic | 178                     | 93.11                 |

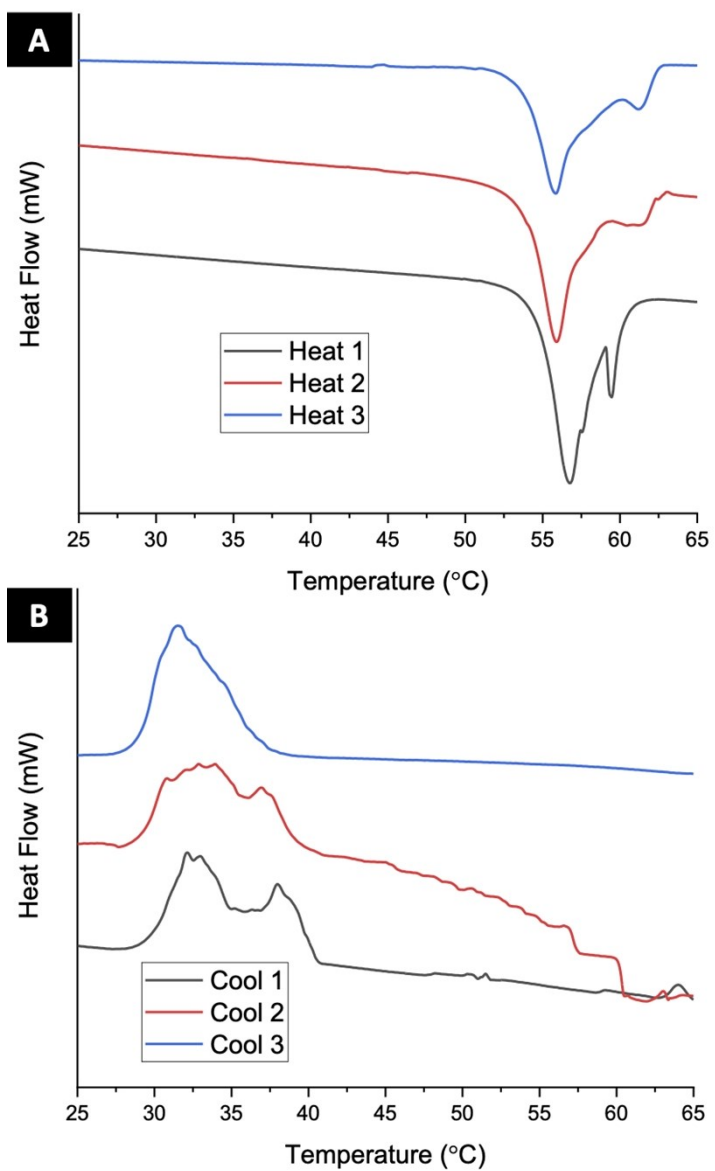

**Figure S2.** DSC analysis of NIPAM:ChCl 3:1 DEM systems and reproducibility of multiple heating (panel A) and cooling (panel B) loops. Heating/cooling rate = 5 °C min<sup>-1</sup>.

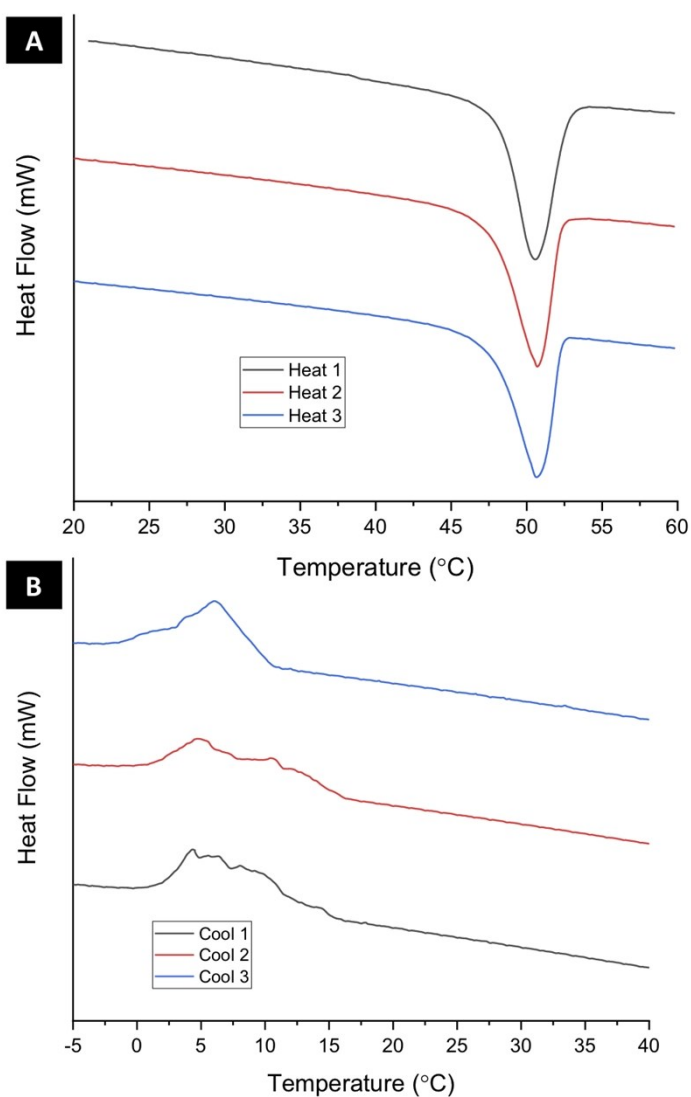

**Figure S3.** DSC analysis of NIPAM:AcChCl 3:1 DEM systems and reproducibility of multiple heating (panel A) and cooling (panel B) loops. Heating/cooling rate = 5 °C min<sup>-1</sup>.

**Table S3.** DSC Analysis of NIPAM:ChCl 3:1 DEM systems (heating/cooling rate = 5 °C min<sup>-1</sup>).

| Cycle            | $T_{\text{onset}}(^{\circ}\text{C})$ | Mean       | $T_{\text{max}}(^{\circ}\text{C})$ | Mean       | $\Delta H$ (J/g) |
|------------------|--------------------------------------|------------|------------------------------------|------------|------------------|
| NIPAM:ChCl 3:1   |                                      |            |                                    |            |                  |
| Heat 1           | 54.2                                 | 53.9 ± 0.3 | 56.5                               | 55.9 ± 0.6 | 69.2 ± 3.4       |
| Heat 2           | 53.8                                 |            | 55.7                               |            |                  |
| Heat 3           | 53.6                                 |            | 55.6                               |            |                  |
| Cool 1           | 40.4                                 | 39.1 ± 1.6 | 32.2                               | 32.6 ± 1.4 | - 67.1 ± 2.5     |
| Cool 2           | 39.3                                 |            | 34.0                               |            |                  |
| Cool 3           | 37.5                                 |            | 31.6                               |            |                  |
| NIPAM:AcChCl 3:1 |                                      |            |                                    |            |                  |
| Heat 1           | 48.2                                 | 48.0 ± 0.2 | 50.6                               | 50.7 ± 0.1 | 79.1 ± 7.6       |
| Heat 2           | 47.8                                 |            | 50.7                               |            |                  |
| Heat 3           | 48.1                                 |            | 50.8                               |            |                  |
| Cool 1           | 15.2                                 | 15.1 ± 1.2 | 4.4                                | 5.1 ± 1.1  | - 50.7 ± 3.0     |
| Cool 2           | 16.3                                 |            | 4.9                                |            |                  |
| Cool 3           | 13.8                                 |            | 6.1                                |            |                  |

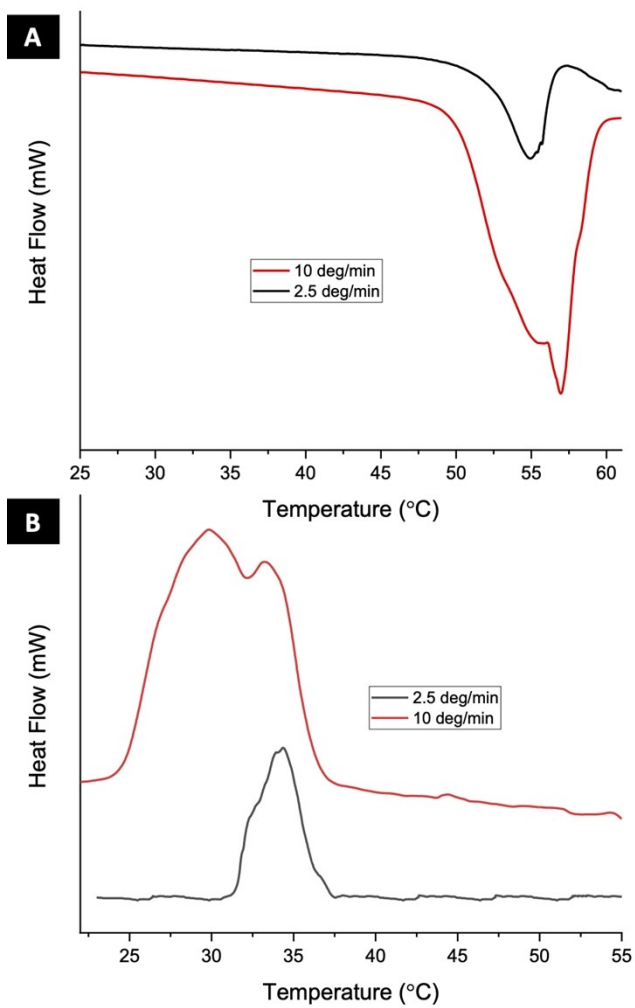

**Figure S4.** DSC analysis of NIPAM:ChCl 3:1 DEM systems as a function of DSC heating rate.

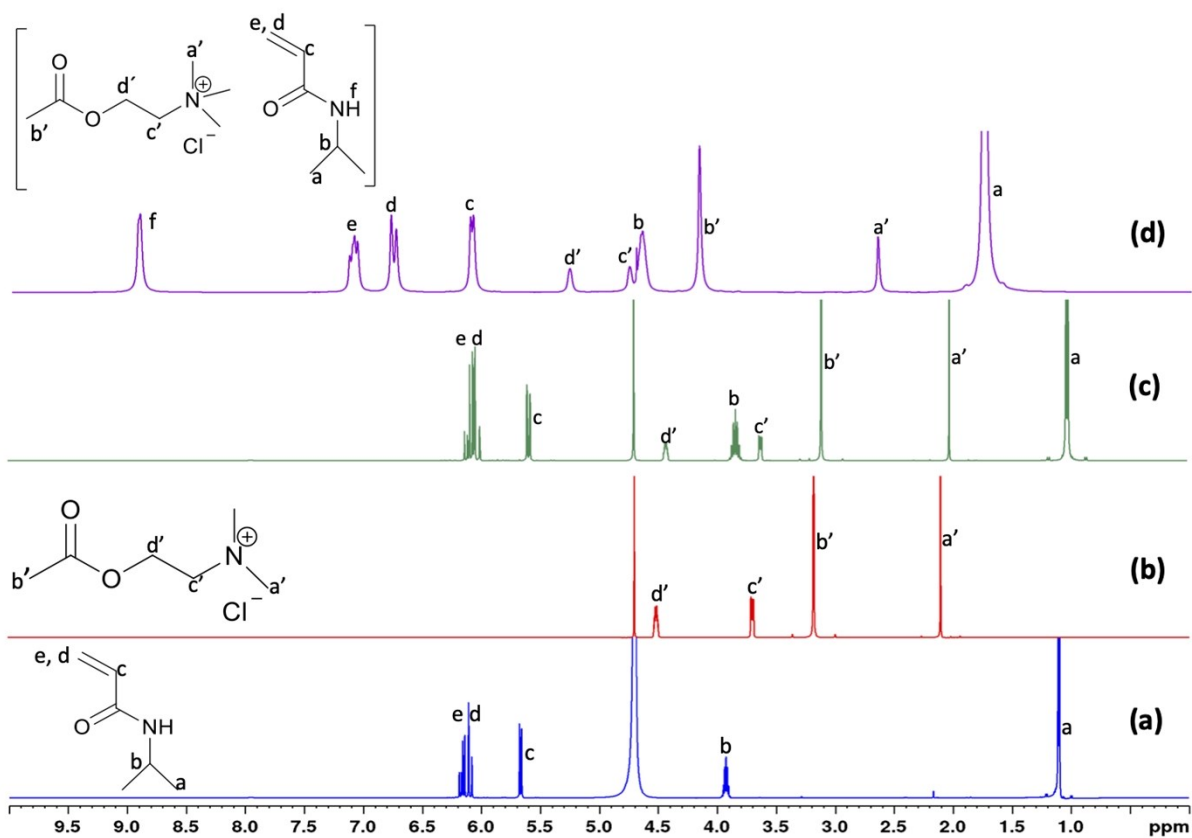

**Figure S5a.**  $^1\text{H}$  NMR spectra a) NIPAM; b) AcChCl; c) a 3:1 mixture of NIPAM and AcChCl (all in  $\text{D}_2\text{O}$ ); d) NIPAM:AcChCl DEM obtained by using a small capillary of  $\text{D}_2\text{O}$  placed in the sample.

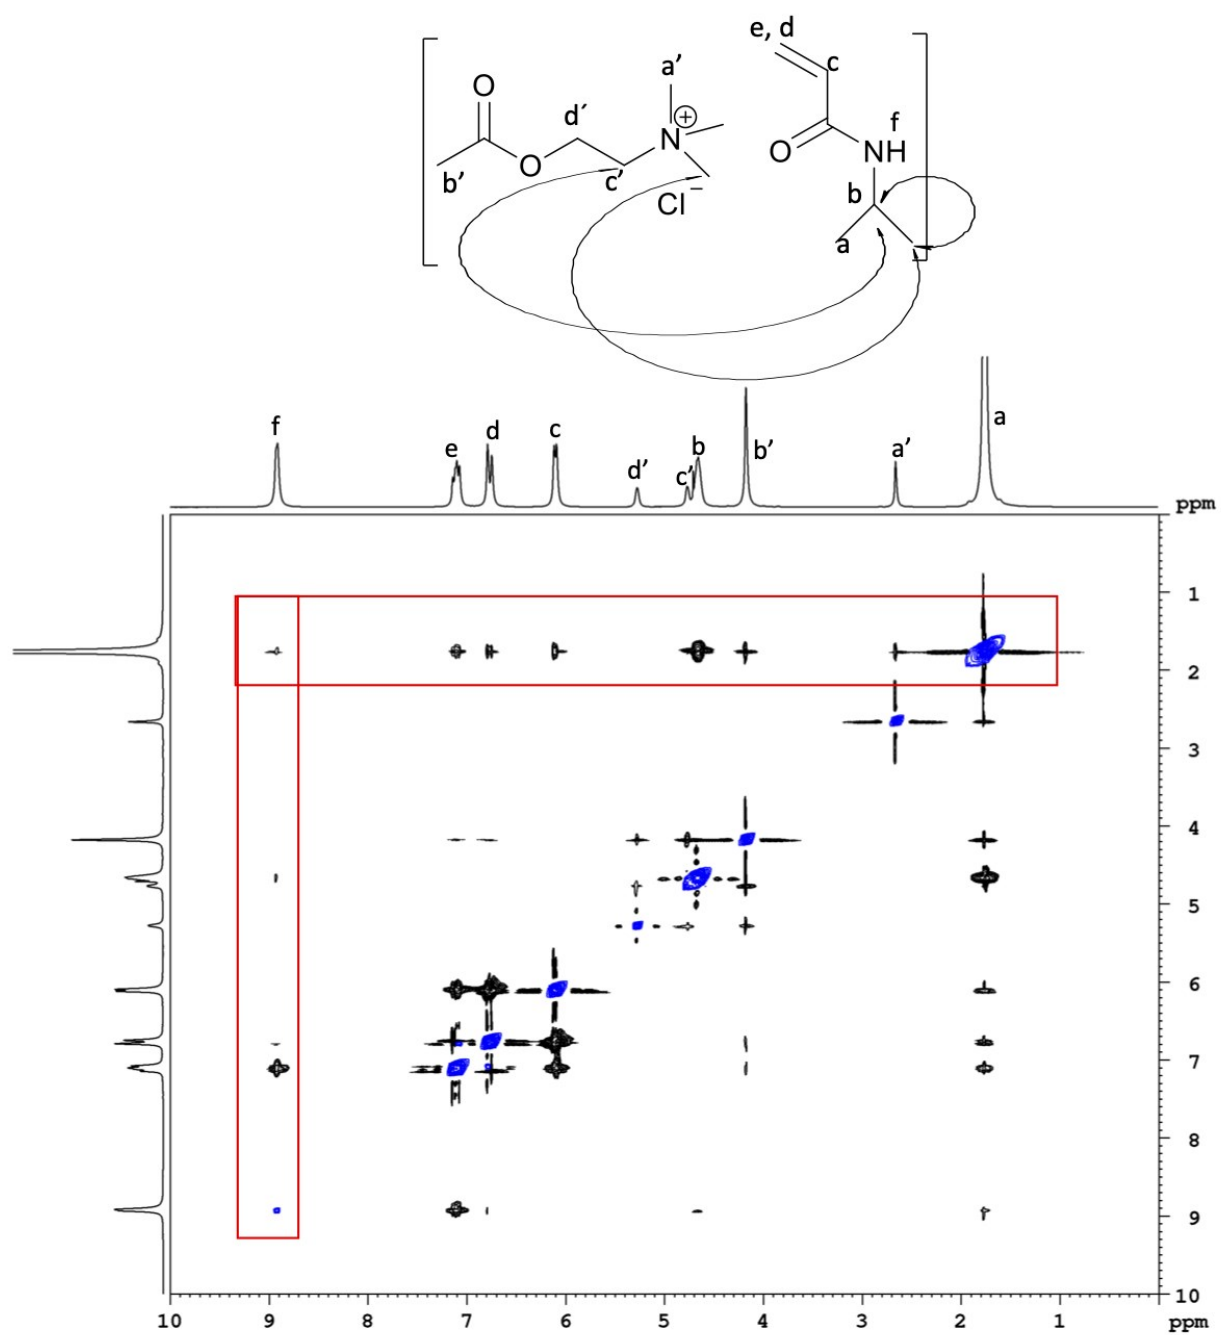

**Figure S5b.**  $^1\text{H}$ - $^1\text{H}$  ROESY spectrum of NIPAM:AcChCl DEM.



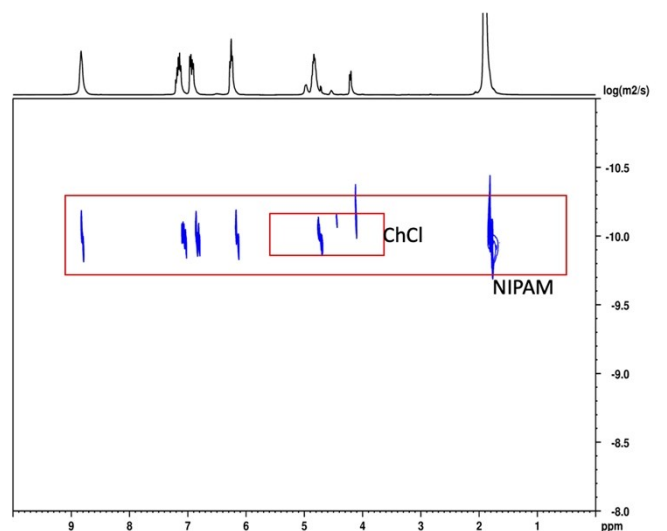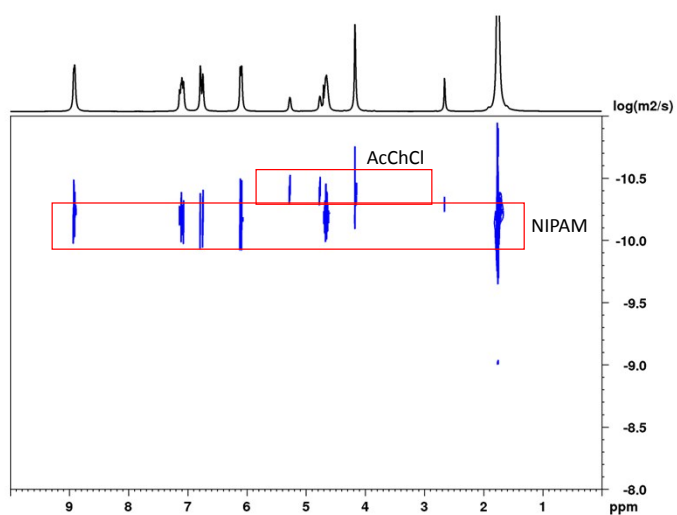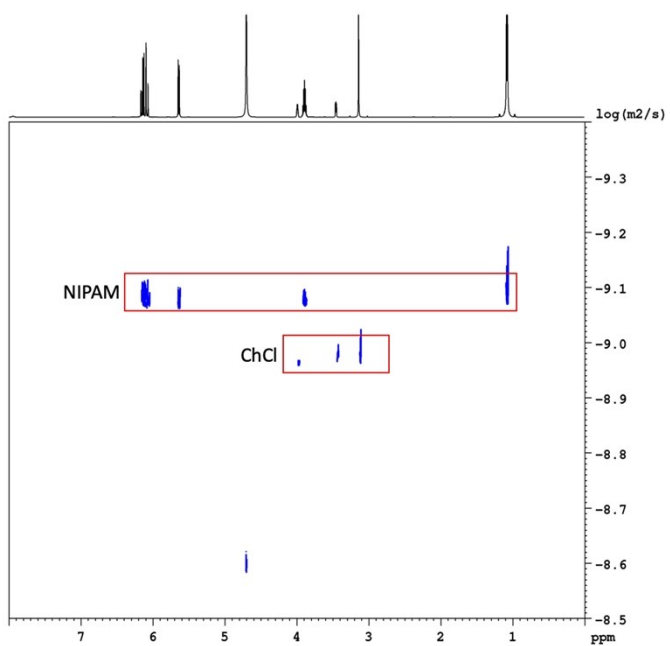

**Figure S6.** <sup>1</sup>H DOSY NMR spectra of (top) NIPAM:ChCl DEM; (middle) NIPAM:AcChCl DEM; (bottom) NIPAM and ChCl dissolved in D<sub>2</sub>O.

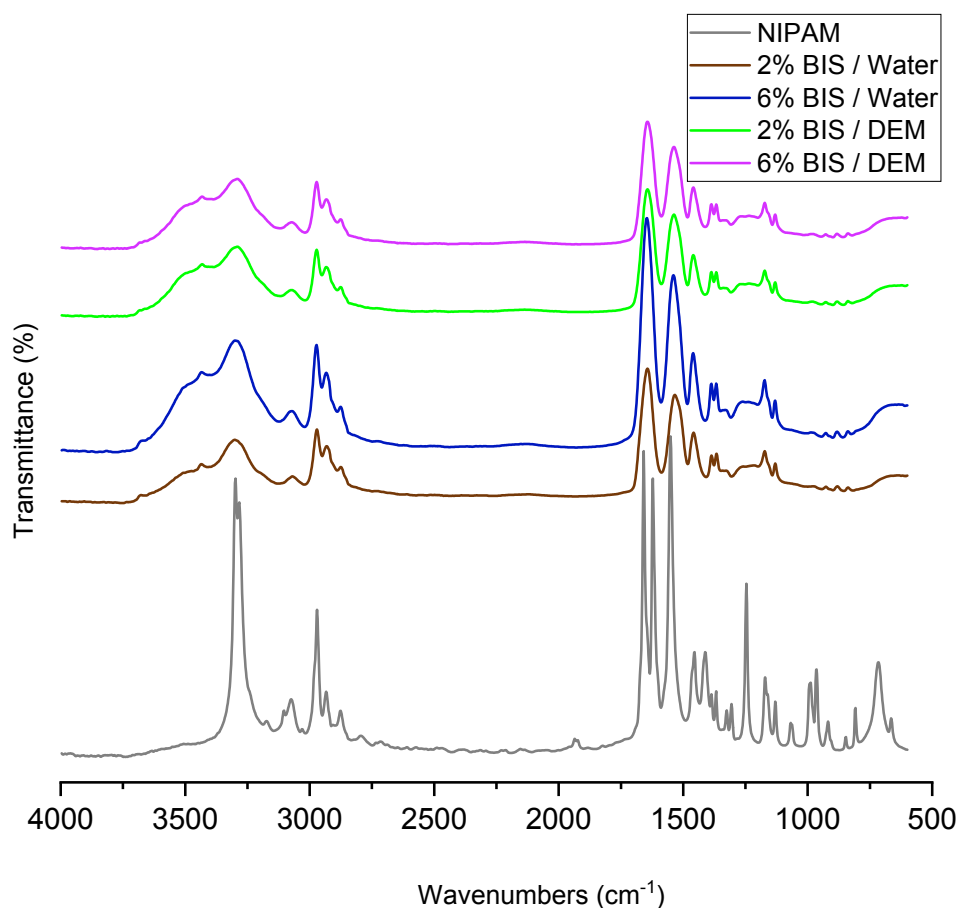

**Figure S7.** ATR-FTIR spectra of poly(NIPAM-co-BIS) hydrogels prepared in both DEMs and water.

The bands appearing at  $2850\text{ cm}^{-1}$  and  $2900\text{ cm}^{-1}$  are assigned to C–H stretching vibrations. The amide group N–H bending peak is also observed at  $1550\text{ cm}^{-1}$ . The broad band at  $3240\text{ cm}^{-1}$  is consistent with O–H and N–H stretching vibrations of carboxyl and amide groups. Additionally, the broad intense band in the range  $800\text{--}1300\text{ cm}^{-1}$  can be assigned to C–O stretching and C–H bending vibrations.

**Table S4.** TGA Analysis of PNIPAM-BIS Hydrogels.

| Sample          | $T_{\text{onset}}$ (°C) | Weight loss $T < 200$ °C (%) | Weight loss $200 < T < 600$ °C (%) |
|-----------------|-------------------------|------------------------------|------------------------------------|
| BIS 2% / DEM    | 346.9                   | 10.48                        | 80.68                              |
| BIS 6 % / DEM   | 346.3                   | 7.87                         | 86.87                              |
| BIS 2 % / water | 362.2                   | 2.45                         | 92.73                              |
| BIS 6 % / water | 345.3                   | 4.88                         | 91.72                              |

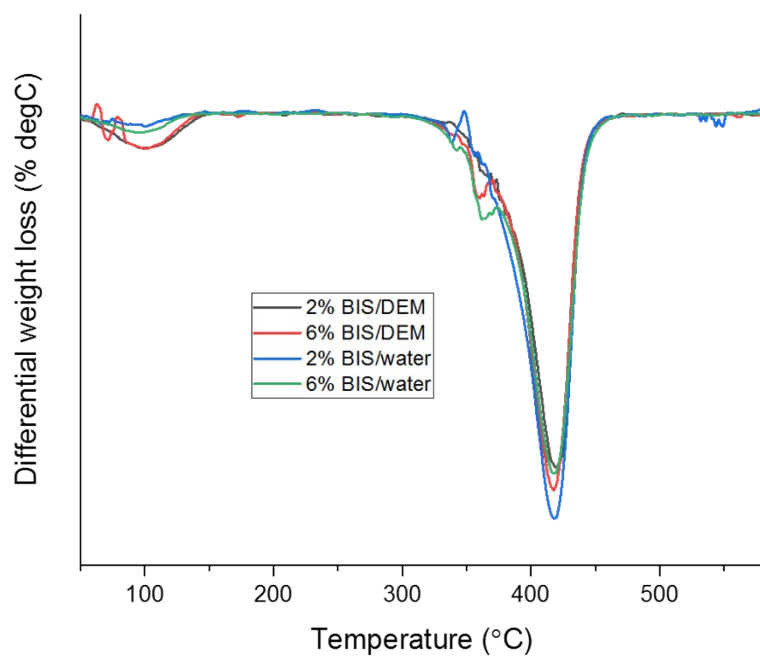

**Figure S8.** Differential TGA Analysis of PNIPAM-BIS Hydrogels.

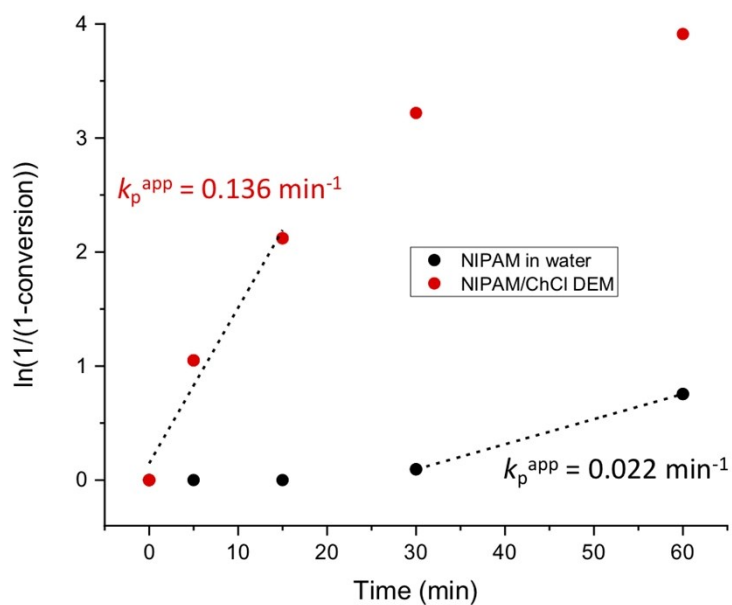

**Figure S9.** Plot of  $\ln(1/(1-\text{conversion}))$  versus time for the polymerization of NIPAM in both a NIPAM:ChCl DEM system as well as in water.

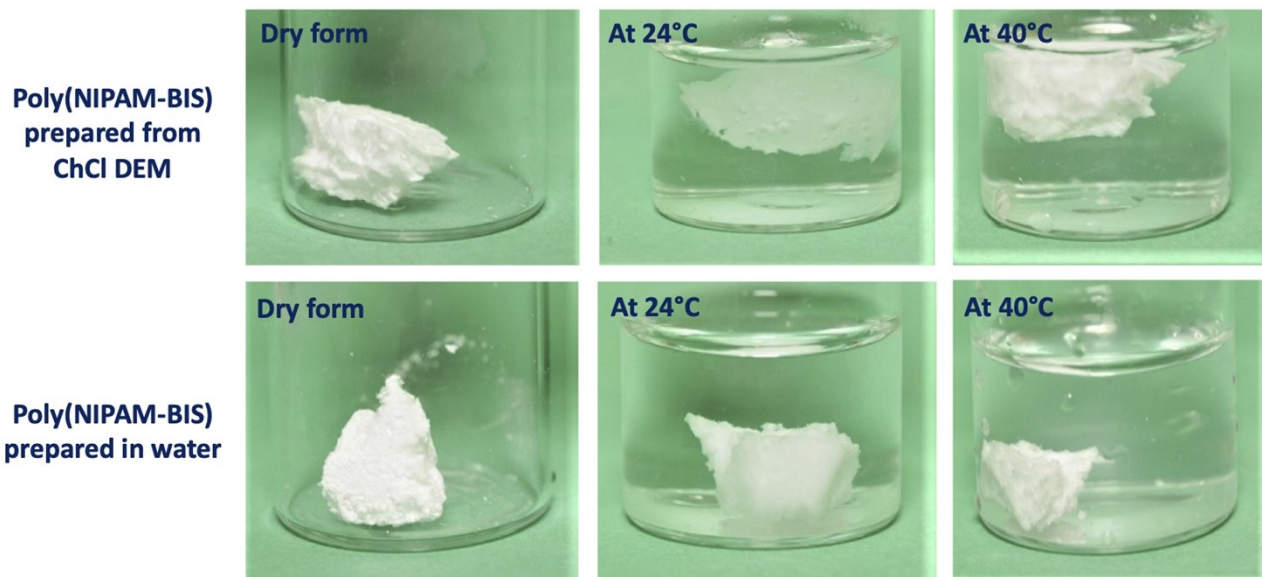

**Figure S10.** Photographs of freeze-dried hydrogels prepared by different methods.

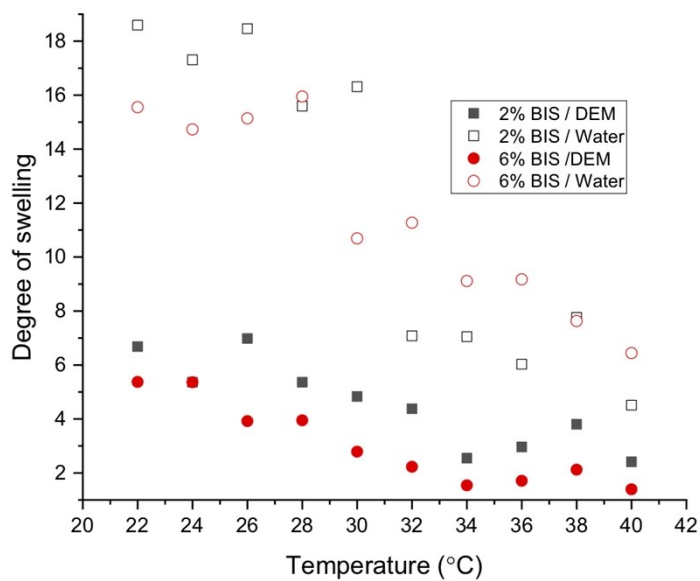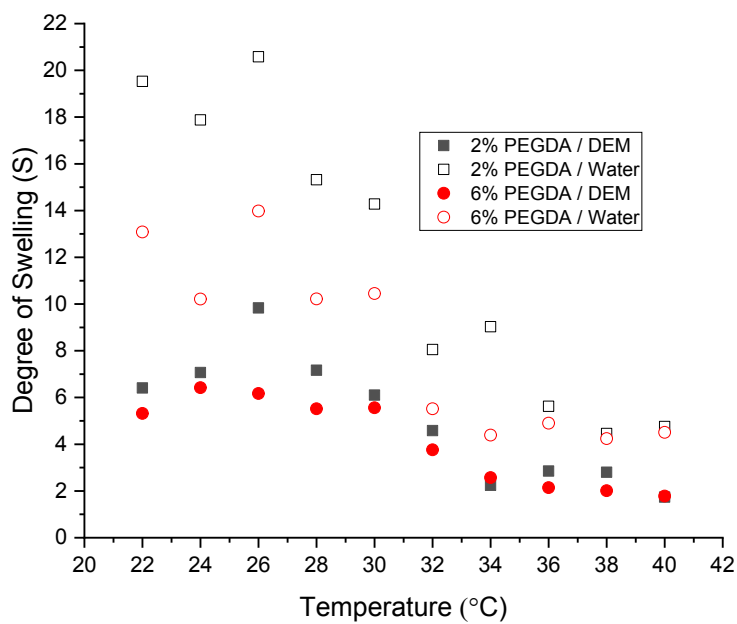

**Figure S11.** Degree of swelling (S) versus temperature for polyNIPAM-based gels prepared from ChCl DEMs (filled symbols) or water (open symbols). The crosslinker concentration was either 2 % (squares) or 6 % (circles) relative to NIPAM. Top panel: BIS as crosslinker; Bottom panel: PEGDA as crosslinker.

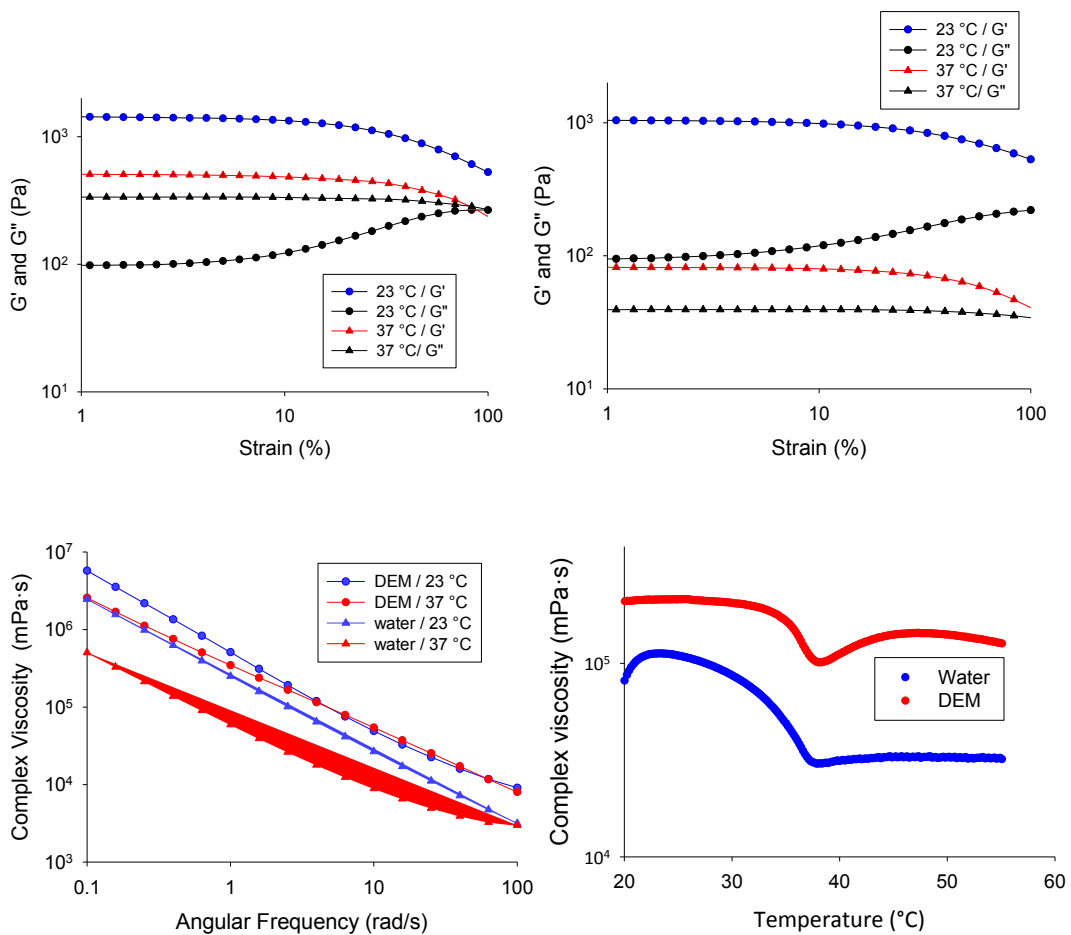

**Figure S12.** Rheological analysis of poly(NIPAM-co-BIS) gels swollen with water. (Top left): amplitude sweep of gels prepared from ChCl DEM. (Top right): amplitude sweep of gels prepared from water. (Bottom left): Frequency sweep comparison of the two gels. (Bottom right): Complex viscosity of the two gels as a function of temperature.

### Flory-Rehner Analysis:

Flory-Rehner theory was used to determine the average molecular weight between crosslinks ( $M_c$ ) based on the equilibrium degree of swelling ( $S_{eq}$ ) of the hydrogels prepared in this work. The Flory-Rehner equation for an affine network model can be stated as:

$$\ln(1-\phi) + \phi + \chi\phi^2 = \frac{d_p V_s}{M_c} \left[ \left( \frac{\phi}{2\phi_0} \right) - \left( \frac{\phi}{\phi_0} \right)^{1/3} \right]$$

Where  $\phi$  = polymer volume fraction in the gel,  $\chi$  the Flory-Huggins parameter between the polymer and solvent,  $d_p$  the density of polymer,  $V_s$  the molar volume of solvent,  $M_c$  the average molecular weight between crosslinks, and  $\phi_0$  the polymer volume fraction of the gel in a reference state (see below discussion).

The following temperature and concentration dependence of  $\chi$  was used:<sup>1</sup>

$$\chi = \frac{1}{2} - A \left( 1 - \frac{\theta}{T} \right) + C\phi + D\phi^2$$

Where  $\theta$  is the theta temperature for NIPAM (303.6 K), and  $A$ ,  $C$  and  $D$  are coefficients. Values of  $A = -2$ ,  $C = 0.32$ ,  $D = 0.24$  were used based on recently published values,<sup>1</sup> however we acknowledge there are numerous functional forms (and values of these coefficients) reported in the literature.

The volume fraction of polymer  $\phi$  was calculated from equilibrium swelling values via the following relation:

$$\phi = \frac{1}{1 + \frac{d_p}{d_s} S_{eq}}$$

Where  $d_p$  and  $d_s$  are the densities of polymer and solvent respectively. The values of  $d_p$  and  $d_s$  used in this work for polyNIPAM and water were 1.1 and 1.0 g mL<sup>-1</sup> respectively.

The volume fraction of polymer for each gel at different temperatures studied, in addition to the temperature and concentration-dependent value of the Flory-Huggins parameter, were used to determine the value of  $M_c$  that provided the best fit to experimental data. The value of  $M_c$  was then used to calculate the effective cross-linking density  $q_{eff}$ , which is defined as  $M_0/M_c$  where  $M_0$  is the molar mass of a NIPAM repeat unit (113 Da).

There is significant debate regarding the value and interpretation of  $\phi_0$ ,<sup>2</sup> numerous authors define this quantity as the polymer volume fraction during gel preparation, however Lopez and Richtering<sup>1</sup> show that this often gives poor fit to data and  $\phi_0$  is typically much smaller (2 – 6 % of this value). In this work,  $\phi_0$  was allowed to be a free parameter in the fit to experimental data, and the following values were obtained:

| Gel        | $\phi_0$ |
|------------|----------|
| Water      | 0.020    |
| ChCl DEM   | 0.056    |
| AcChCl DEM | 0.073    |



For the gel prepared in water, a value of  $\phi_0 = 0.020$  is comparable to the work of Lopez and Richtering,<sup>1</sup> whereas the DEM-based gels present higher  $\phi_0$  values, indicative of their different method of preparation.

**Table S5.** Swelling properties of poly(NIPAM-co-PEGDA) gels when immersed in water.

| Method of gel preparation | Temp (°C) | $S_{eq}^a$       | $M_c$ (Da) <sup>b</sup> | $q_{eff}^c$           |
|---------------------------|-----------|------------------|-------------------------|-----------------------|
| ChCl DEM                  | 22        | $6.29 \pm 0.17$  | $4165 \pm 190$          | 0.0273                |
|                           | 40        | $1.64 \pm 0.05$  |                         |                       |
| Water                     | 22        | $21.69 \pm 0.53$ | $23620 \pm 980$         | $4.82 \times 10^{-3}$ |
|                           | 40        | $3.65 \pm 0.10$  |                         |                       |

<sup>1</sup> Lopez, C.G. and Richtering, W. *Soft Matter*, **2017**, 13, 8271

<sup>2</sup> Quesada-Pérez, M. *et al*, *Soft Matter*, **2011**, 7, 10536.
